# Supplementary material for: Single-dose VSV-based vaccine protects against Kyasanur Forest disease in nonhuman primates
Source: PubMed Central journal article supplement — Sci Adv. 2023 Sep 6;9(36):eadj1428. doi: 10.1126/sciadv.adj1428 (PMC10482351; doi:10.1126/sciadv.adj1428), 2023-09-06
Supplement: sciadv.adj1428_sm.pdf [file sciadv.adj1428_sm.pdf]

Supplementary Materials for  
**Single-dose VSV-based vaccine protects against Kyasanur Forest disease in  
nonhuman primates**

Bharti Bhatia *et al.*

Corresponding author: Heinz Feldmann, [feldmannh@niaid.nih.gov](mailto:feldmannh@niaid.nih.gov)

*Sci. Adv.* **9**, eadj1428 (2023)  
DOI: 10.1126/sciadv.adj1428

**This PDF file includes:**

Figs. S1 to S5  
Tables S1 and S2

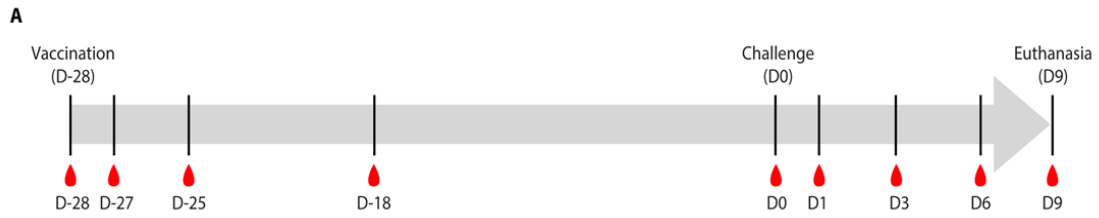

**Figure S1: Study layout.** Pigtailed macaques were vaccinated intramuscularly with  $1 \times 10^7$  PFU of either VSV-KFDV (study group;  $n=6$ ) or VSV-EBOV (control group;  $n=4$ ) at D-28, challenged subcutaneously and intravenously with  $1 \times 10^5$  TCID<sub>50</sub> of KFDV each at D0, and euthanized for necropsy at D9. Animals were monitored throughout the study at least twice daily for clinical signs and examinations, including blood draw, swabs and body weight determination, were performed at D-28, D-27, D-25, D-18, D0, D1, D3, D6, and D9. Samples were used for virology, immunology and pathology.

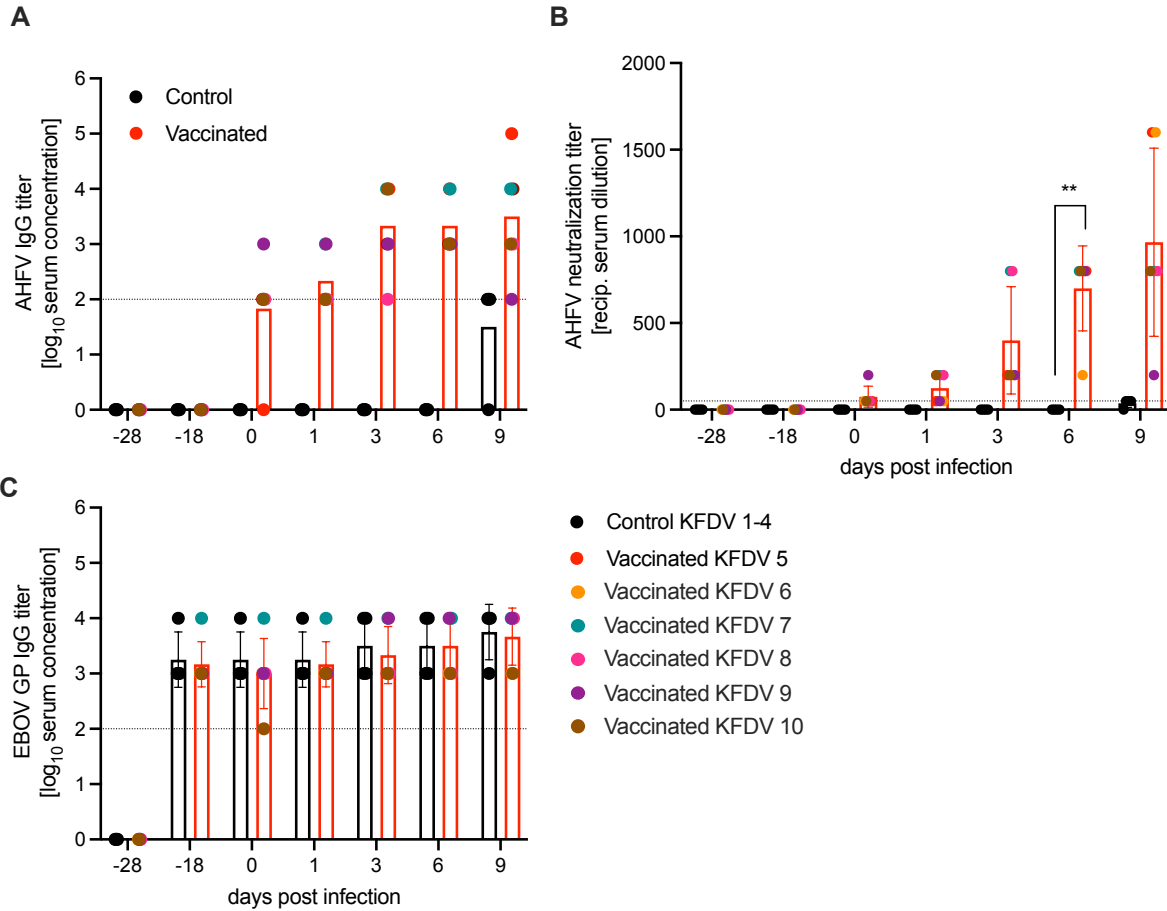

**Figure S2: Cross-reactive humoral immune responses after VSV-KFDV vaccination and KFDV challenge.** (A) Total IgG-specific antibodies to AHFV were determined by ELISA on serum samples collected from animals immunized with VSV-KFDV (n=6), and VSV-EBOV (n=4). (B) The same serum samples were tested for their neutralizing activity against AHFV. The highest titer that completely neutralized 100 TCID<sub>50</sub> of AHFV are shown. (C) Total IgG-specific antibodies to EBOV GP were determined by ELISA on the same serum samples. Each dot represents a single animal. The dotted lines represent assay limits. Statistical significance was analyzed using two-way Anova and Tukey's multiple comparisons; significant results are indicated as **\*\*** $p < 0.01$ .

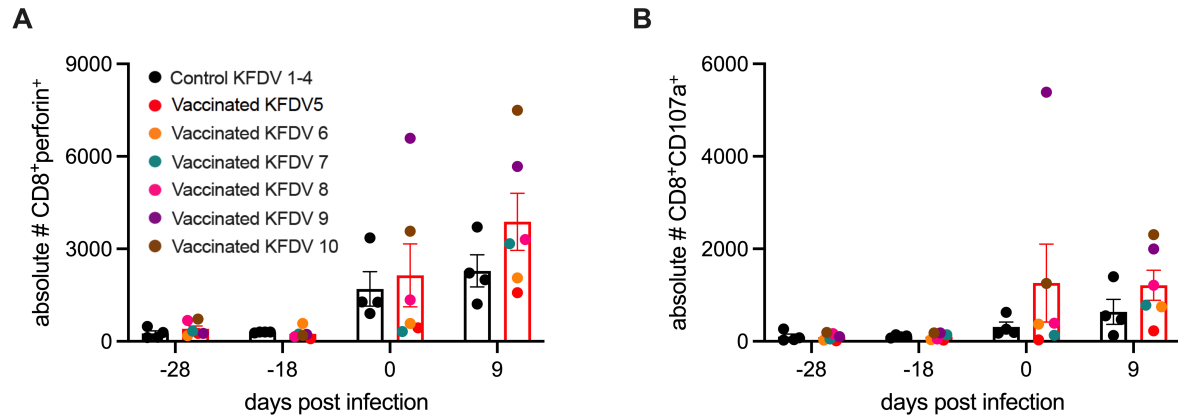

**Figure S3: Adaptive immune responses after VSV-KFDV vaccination and KFDV challenge.** (A-B) VSV-KFDV-specific T-cell responses. Cryopreserved PBMCs were stimulated with pooled overlapping peptides derived from the KFDV E protein and analyzed by flow cytometry. All measurements were performed in duplicate for each animal. (A) CD8<sup>+</sup>perforin, and (B) CD8<sup>+</sup> CD107a. Statistical significance between control (black, VSV-EBOV) or study (red, VSV-KFDV) macaques was analyzed by two-way Anova with Sidak's multiple comparisons.

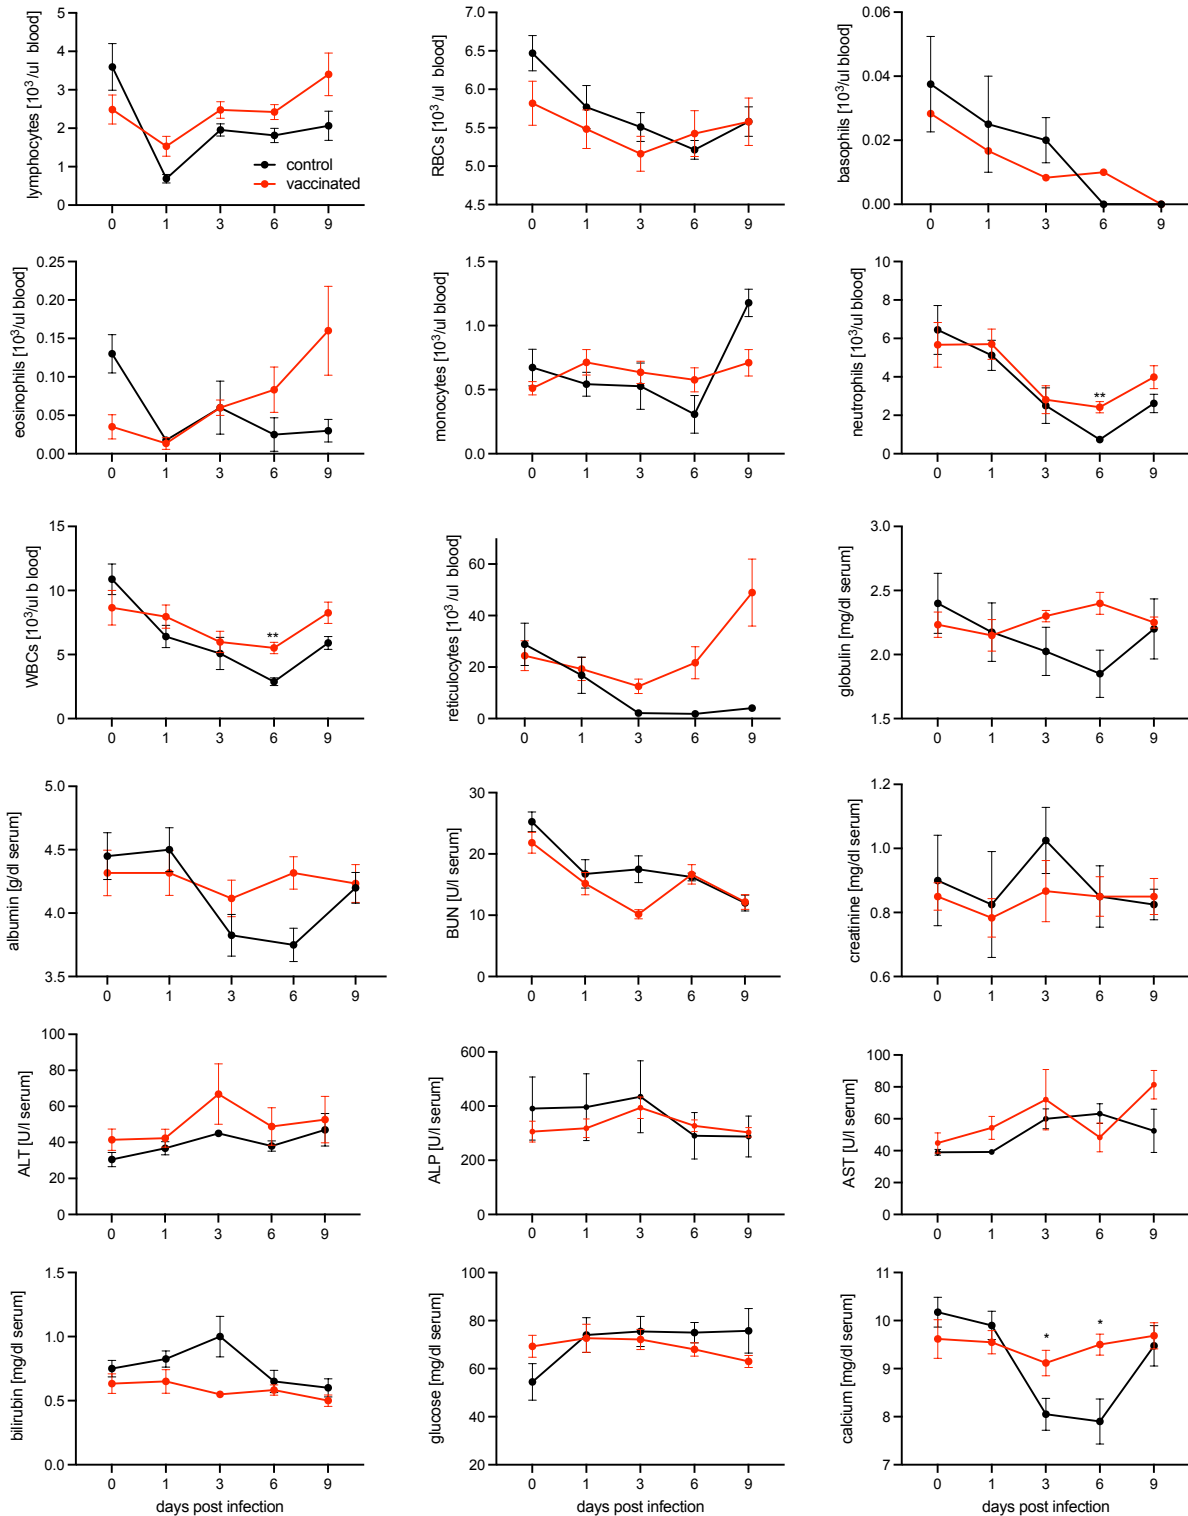

**Figure S4: Hematologic and blood chemistry parameters post KFDV challenge.** Hematology was performed on EDTA blood and blood chemistry on serum samples collected

from animals immunized with VSV-KFDV (n=6), and VSV-EBOV (n=4). Lymphocytes, red blood cells (RBCs), basophils, eosinophils, monocytes, neutrophils, white blood cells (WBC), reticulocytes, globulin, albumin, blood urea nitrogen (BUN), creatinine, alanine transaminase (ALT), alkaline phosphatase (ALP), aspartate aminotransferase (AST), bilirubin, glucose, and calcium. Data are shown as mean plus standard error of the mean. Statistical significance was analyzed using two-way Anova with Sidak's multiple comparisons; significant results are indicated as \* $p < 0.05$ , \*\* $p < 0.01$ .

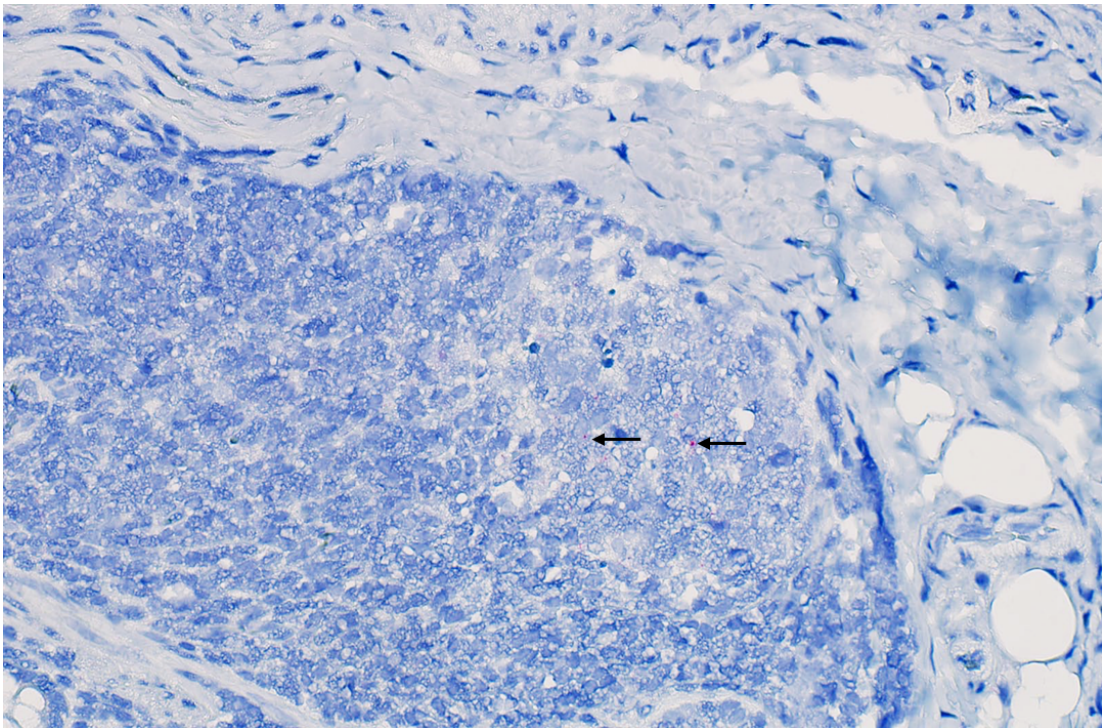

**Figure S5: Detection of KFDV genomic RNA in colon section.** Animals were euthanized and necropsied at D9 following KFDV challenge. Formalin-fixed tissue sections were processed for *in-situ* hybridization targeting KFDV genome RNA. The image shows a section from a lymphoid follicle in the colon of a representative vaccinated animal with only minimal KFDV genomic signal (magnification at 400x).

| Monkey  | Signs                                                                                                                                                                              |
|---------|------------------------------------------------------------------------------------------------------------------------------------------------------------------------------------|
| KFDV 1  | Severely decreased appetite, piloerection, clear nasal discharge, hunched posture, tired, slow movements, mild facial edema, irregular respirations, muddy mucus membranes day 6&9 |
| KFDV 2  | Severely decreased appetite, hunched posture, slow& careful movements, abdominal respirations, rubbing his nose, mildly dehydrated (5-8%), elevated temperature on day 1           |
| KFDV 3  | Decreased appetite, nasal discharge, irregular abdominal breathing, hunched posture, slow& tired, shivering                                                                        |
| KFDV 4  | Severely decreased appetite, bloody nasal discharge, hunched posture, increased irregular respirations                                                                             |
| KFDV 5  | normal                                                                                                                                                                             |
| KFDV 6  | Decreased appetite                                                                                                                                                                 |
| KFDV 7  | Decreased appetite                                                                                                                                                                 |
| KFDV 8  | Decreased appetite                                                                                                                                                                 |
| KFDV 9  | Decreased appetite                                                                                                                                                                 |
| KFDV 10 | Decreased appetite                                                                                                                                                                 |

**Table S1: Clinical observations after KFDV challenge.** Animals KFDV 1-4 were VSV-EBOV vaccinated (control group) and animals KFDV 5-10 were VSV-KFDV vaccinated (study group). All animals were challenged with  $2 \times 10^5$  TCID<sub>50</sub> of KFDV 28 days after vaccination. Animals were monitored twice daily for clinical signs form D0 (challenge) to D9 (necropsy).

| Monkey  | Signs                                                                                                                                                                                                                                                                     |
|---------|---------------------------------------------------------------------------------------------------------------------------------------------------------------------------------------------------------------------------------------------------------------------------|
| KFDV 1  | Liver: chronic congested, enlarged, reticulated, rounded edges, hemorrhage<br>Spleen: enlarged, firm, turgid<br>Heart: flabby ventricle, rounded, large R ventricle plaque in pulmonary; thickened valves<br>Lungs: tan aspects, possible HF<br>Brain& meninges: injected |
| KFDV 2  | Spleen: enlarged, firm, turgid<br>Mesenteric LN: enlarged<br>Lungs: hemorrhagic, ecchymosis, L7R dorsal & ventral<br>Brain& meninges: injected                                                                                                                            |
| KFDV 3  | Brain & meninges: injected                                                                                                                                                                                                                                                |
| KFDV 4  | Bilateral epistaxis                                                                                                                                                                                                                                                       |
| KFDV 5  | Crusted skin lesion on back, site of subcutaneous inoculation                                                                                                                                                                                                             |
| KFDV 6  | Small intestine: ileus                                                                                                                                                                                                                                                    |
| KFDV 7  | Small intestine: ileus                                                                                                                                                                                                                                                    |
| KFDV 8  | normal                                                                                                                                                                                                                                                                    |
| KFDV 9  | Liver: pale                                                                                                                                                                                                                                                               |
| KFDV 10 | Liver: pale                                                                                                                                                                                                                                                               |

**Table S2: Gross pathology after KFDV challenge.** Animals KFDV 1-4 were VSV-EBOV vaccinated (control group) and animals KFDV 5-10 were VSV-KFDV vaccinated (study group). All animals were challenged with  $2 \times 10^5$  TCID<sub>50</sub> of KFDV 28 days (D0) after vaccination and euthanized for necropsy on D9.
